# Supplementary material for: Filling reference gaps via assembling DNA barcodes using high-throughput sequencing—moving toward barcoding the world
Source: Oxford University Press journal article supplement (doi:10.1093/gigascience/gix104), 2017-10-25
Supplement: gix104_supplemental_figure_s2.pdf [file gix104_supplemental_figure_s2.pdf]

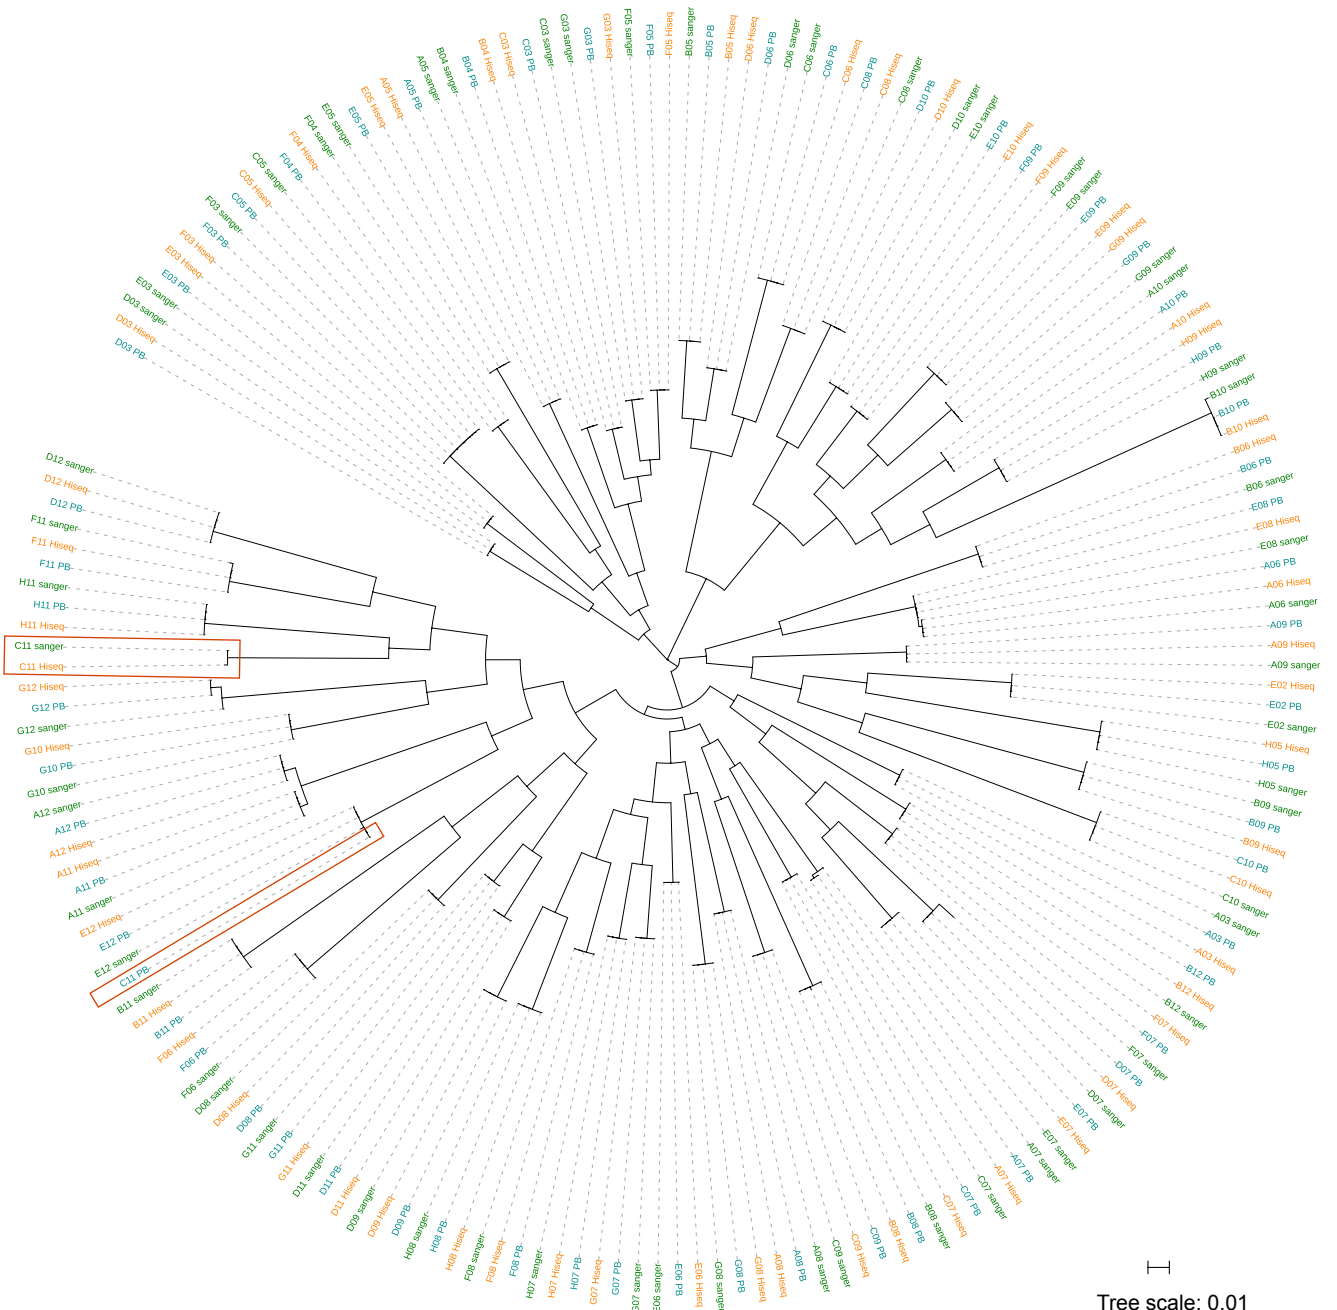

Tree scale: 0.01
