# Supplementary material for: Filling reference gaps via assembling DNA barcodes using high-throughput sequencing—moving toward barcoding the world
Source: Gigascience. 2017 Oct 25;6(12):1–8. doi: 10.1093/gigascience/gix104 (PMC5726475; doi:10.1093/gigascience/gix104)
Supplement: Supplementary Table S3. Comparison of 18 Pacbio barcodes and HIFI-Barcodes [file gix104_supplemental_table_s3.xlsx]

## Sheet: Sheet1
Supplemental Table S3: Comparison of 18 Pacbio barcodes and HIFI-barcodes
sample ID	Translation check		mismatch	gap	mismatch sites
	HIFI-Barcode	Pacbio			Pacbio	HIFI-Barcode	Pacbio	HIFI-Barcode
B03	ok	ok	100% match
D04	ok	ok
B02	ok	ok
H04	ok	ok
D05	ok	ok
G05	ok	ok
B07	ok	ok
F12	ok	ok
E04	ok	ok
D01	ok	ok
A01	ok	ok	2	0	T	C:789/T:2030	G	A:714/G:1105
H02	ok	ok	1	0	C	C:432/T:20840
C01	ok	ok	1	0	T	T:21/A:122
E01	ok	No	5	2
F01	ok	No	0	3
G02	ok	No	0	2
G04	ok	No	0	1
F10	ok	No	1	1
