# Supplementary material for: Filling reference gaps via assembling DNA barcodes using high-throughput sequencing—moving toward barcoding the world
Source: Gigascience. 2017 Oct 25;6(12):1–8. doi: 10.1093/gigascience/gix104 (PMC5726475; doi:10.1093/gigascience/gix104)
Supplement: Supplementary Table S4. Nontarget sequences detected by HIFI-Barcode [file gix104_supplemental_table_s4.xlsx]

## Sheet: sheet1
Supplemental table S4: Non-target sequences detected by HIFI-Barcode
plate ID	Sequences ID	BOLD							NCBI				Blast against HIFI-barcodes in our plates				Blast against Pacbio CCSs (passes number >15)					probability
		phylum	class	order	family	genus	species	identity(%)	Subject_id	Identity	species	Subject_annotation	hit samples in well	identity	length	mismatch	sequence ID of CCSs	identity	length	mismatch	gap
1	F01_2-2	Arthropoda	Insecta	Lepidoptera	Sphingidae	Sataspes	xylocoparis	100	gi|347981231|gb|JN678496.1|	100	Sataspes xylocoparis	Sataspes xylocoparis voucher BC-Mel 0500 cytochrome oxidase subunit 1 (COI) gene, partial cds; mitochondrial	NA	NA	NA	NA	NO PACBIO DATA FOR PLATE1					potential PCR errors and pseudo-genes
	C04_2-2	Arthropoda	Insecta	Lepidoptera	Erebidae	Catocala	yunanna	99.53	gi|630056744|gb|KJ380693.1|	96.2	Catocala similis	Catocala similis voucher 3362-COI-08 cytochrome oxidase subunit 1 (COI) gene, partial cds; mitochondrial	NA	NA	NA	NA						potential PCR errors and pseudo-genes
	H04_2-2	Arthropoda	Insecta	Lepidoptera	Notodontidae	Dudusa	nobilis	97.08	gi|1059060767|gb|KX271959.1|	100	Dudusa nobilis	Dudusa nobilis isolate LBGM110730291 cytochrome c oxidase subunit I (COI) gene, partial cds; mitochondrial	H06	100	709	0						cross contamination
	E07_2-2	Arthropoda	Insecta	Lepidoptera	Nymphalidae	Lethe	procne	93.09	gi|317185785|gb|HM240600.1|	91.09	Mycalesis mynois	Mycalesis mynois voucher UK9-14 cytochrome c oxidase subunit I (COI) gene, partial cds;	NA	NA	NA	NA						potential PCR errors and pseudo-genes
	E01_2-2	Ascomycota	Sordariomycetes	Hypocreales	Bionectriaceae	Clonostachys	rosea	87.09	gi|966325806|gb|KR704425.1|	87.2	Verticillium nonalfalfae	Verticillium nonalfalfae mitochondrion, complete genome	NA	NA	NA	NA						Fungi
	B02_2-2	Arthropoda	Insecta	Psocodea	Liposcelidae	Liposcelis	bostrychophila	90.81	gi|349501541|gb|JN645275.1|	98.87	Liposcelis bostrychophila	Liposcelis bostrychophila chromosome LbmtDNA-I mitochondrion, complete sequence, mini-circle	NA	NA	NA	NA						potential PCR errors and pseudo-genes
	B06_2-2	Arthropoda	Insecta	Lepidoptera	Papilionidae	Papilio	forbesi	98.09	gi|331271425|gb|JF681021.1|	98.1	Papilio forbesi	Papilio forbesi voucher CBGPFLC_00205 cytochrome oxidase subunit I (COI) gene, partial cds; mitochondrial	C06	100	709	0						cross contamination
	G06_2-2	Arthropoda	Insecta	Lepidoptera	Notodontidae	Dudusa	nobilis	97.08	gi|1059060767|gb|KX271959.1|	100	Dudusa nobilis	Dudusa nobilis isolate LBGM110730291 cytochrome c oxidase subunit I (COI) gene, partial cds; mitochondrial	H06	100	709	0						cross contamination
2	C02_2-2	Proteobacteria	Alphaproteobacteria	Rickettsiales	NA	NA	NA	84.76	gi|304367649|gb|HM452248.1|	80.77	Flavina sp.	Flavina sp. 1 LZ-2010 cytochrome c oxidase subunit I-like gene, partial sequence; mitochondrial	NA	NA	NA	NA	m170506_092957_42199_c101149142550000001823255607191735_s1_p0/155604/ccs#C02#for	100	722	0	1	Wolbachia
	B03_2-2	Arthropods	insecta	Diptera	Syrphidae	Relictanum	crassum	90.14	gi|821657108|gb|KP402826.1|	89.97	Pseudodoros clavatus	Pseudodoros clavatus voucher JSM2767 cytochrome oxidase subunit 1 (COI) gene, partial cds; mitochondrial	C03	100	709	0	m170506_092957_42199_c101149142550000001823255607191735_s1_p0/136218/ccs#B03#for	100	709	0	0	cross contamination
	G05_2-2	Arthropods	insecta	Diptera	Brachystomatidae	Tichopeza	albocincta	92.19	gi|568779385|dbj|AB669709.1|	90.04	Drosophila tani	Drosophila tani mitochondrial COI gene for cytochrome oxidase subunit I, partial cds, strain: tani-YF	NA	NA	NA	NA	m170506_092957_42199_c101149142550000001823255607191735_s1_p0/42868/ccs#G05#for	98.89	719	7	1	potential PCR errors and pseudo-genes
	B06_2-2	Arthropods	insecta	Lepidoptera	Drepanidae	NA	NA	99.69	gi|612341147|gb|KJ410747.1|	90.13	Gabala argentata	Gabala argentata mitochondrion, complete genome	C06	100	709	0	m170506_092957_42199_c101149142550000001823255607191735_s1_p0/158345/ccs#B06#rev	100	709	0	0	cross contamination
	C11_2-2	Arthropoda	Insecta	Diptera	Dolichopodidae	NA	NA	96.7	gi|91208555|gb|DQ453489.1|	87.85	Lucilia thatuna	Lucilia thatuna cytochrome oxidase subunit I (COI) gene, partial cds; mitochondrial	E12	100	709	0	m170506_092957_42199_c101149142550000001823255607191735_s1_p0/121621/ccs#C11#rev	100	719	0	0	cross contamination
	F11_2-2	Arthropods	insecta	Diptera	Dolichopodidae	NA	NA	96.7	gi|91208555|gb|DQ453489.1|	87.87	Lucilia thatuna	Lucilia thatuna cytochrome oxidase subunit I (COI) gene, partial cds; mitochondrial	E12	100	709	0	m170506_092957_42199_c101149142550000001823255607191735_s1_p0/102820/ccs#F11#rev	100	719	0	0	cross contamination
	E12_2-2	Arthropods	insecta	Diptera	NA	NA	NA	93.2	gi|954018983|gb|KM941554.1|	92.24	Dolichopodidae sp.	Dolichopodidae sp. BOLD:ACD1251 voucher BIOUG04254-H05 cytochrome oxidase subunit 1 (COI) gene, partial cds; mitochondrial	NA	NA	NA	NA	m170506_092957_42199_c101149142550000001823255607191735_s1_p0/66222/ccs#E12#for	100	719	0	0	potential PCR errors and pseudo-genes
	G12_2-2	Arthropods	insecta	Diptera	Dolichopodidae	NA	NA	90.99	gi|1053109731|gb|KR658230.1|	89.51	Dolichopodidae sp.	Dolichopodidae sp. BOLD-2016 voucher BIOUG00855-E09 cytochrome oxidase subunit 1 (COI) gene, partial cds; mitochondrial	NA	NA	NA	NA	m170506_092957_42199_c101149142550000001823255607191735_s1_p0/126695/ccs#G12#for	100	719	0	0	potential PCR errors and pseudo-genes
	F06_2-2	Proteobacteria	Alphaproteobacteria	Rickettsiales	Rickettsiaceae	Wolbachia	NA	99.25	gi|304367649|gb|HM452248.1|	99.11	Flavina sp.	Flavina sp. 1 LZ-2010 cytochrome c oxidase subunit I-like gene, partial sequence; mitochondrial	NA	NA	NA	NA	m170506_092957_42199_c101149142550000001823255607191735_s1_p0/136382/ccs#F06#for	100	725	0	0	Wolbachia
	G11_2-2	Arthropods	insecta	Coleoptera	Chrysomelidae	NA	NA	84.29	gi|542129495|gb|KC185702.1|	98.41	Cneorane fokiensis	Cneorane fokiensis cytochrome oxidase subunit I (COI) gene, partial cds; mitochondrial	NA	NA	NA	NA	m170506_092957_42199_c101149142550000001823255607191735_s1_p0/72110/ccs#G11#rev	100	719	0	0	potential PCR errors and pseudo-genes
				s
